# Supplementary material
Source: Copernicus journal article supplement (doi:10.5194/egusphere-2026-3611)
Supplement: Supplementary file 1 [file egusphere-2026-3611-supplement.pdf]

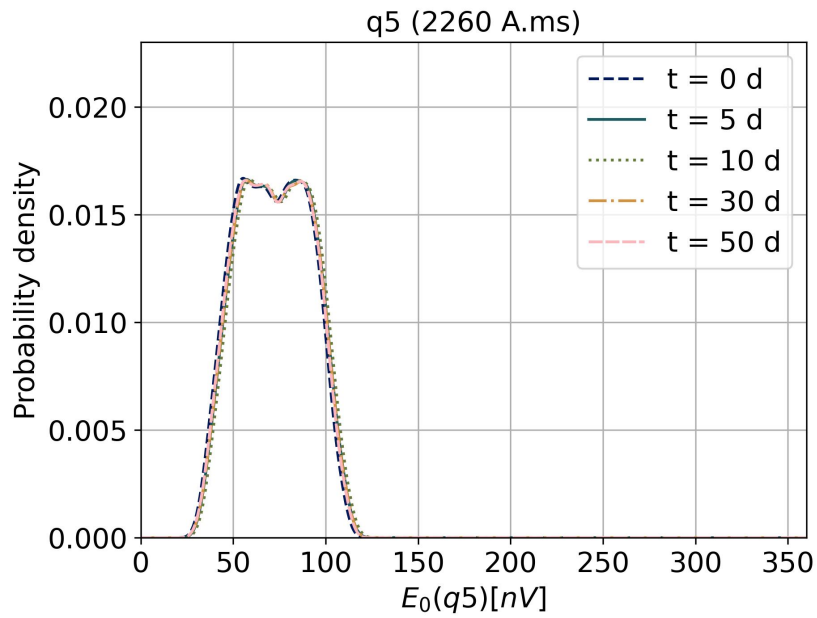

**Figure S1.** MRS signal probability density functions at times  $t \in \{0, 5, 10, 30, 50\}$  days for pulse  $q_5 = 2260$  A.ms.

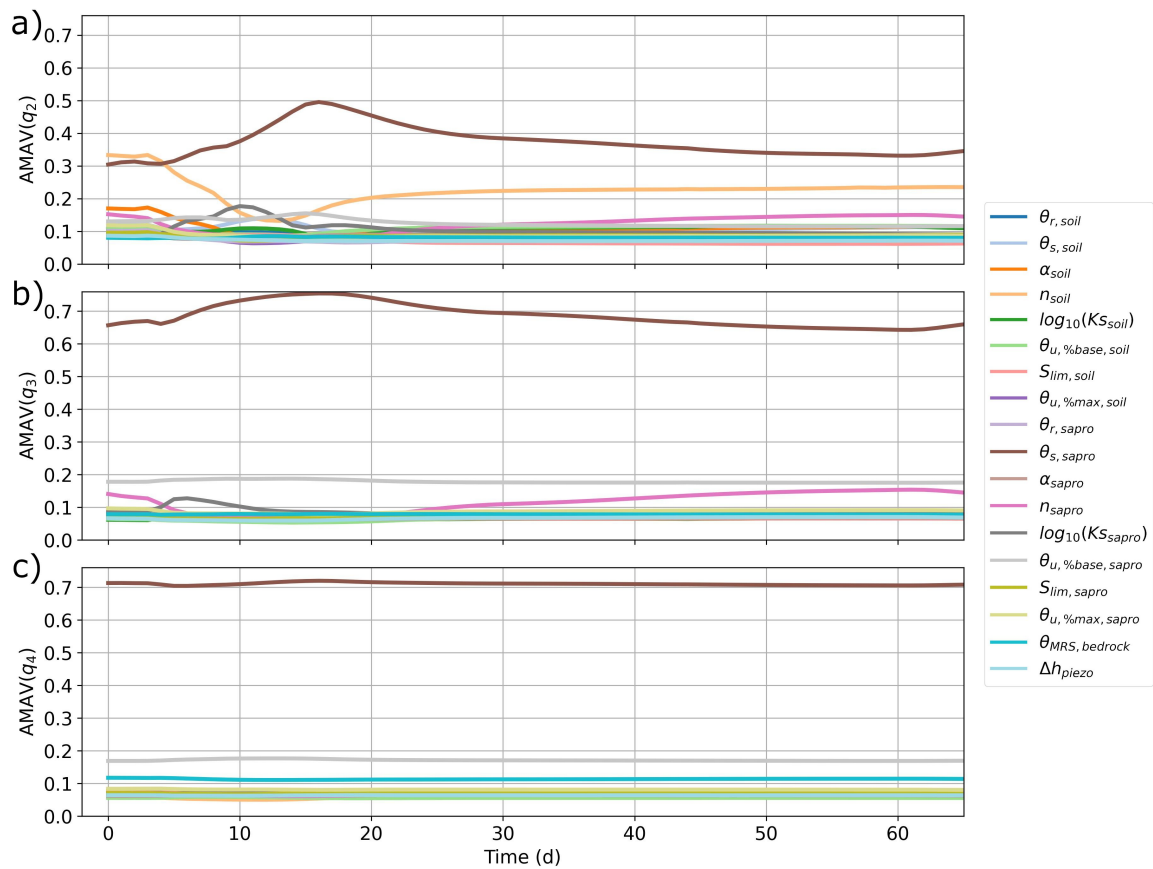

**Figure S2.** AMAV indices time series for pulses a)  $q_2$ , b)  $q_3$ , and c)  $q_4$ .

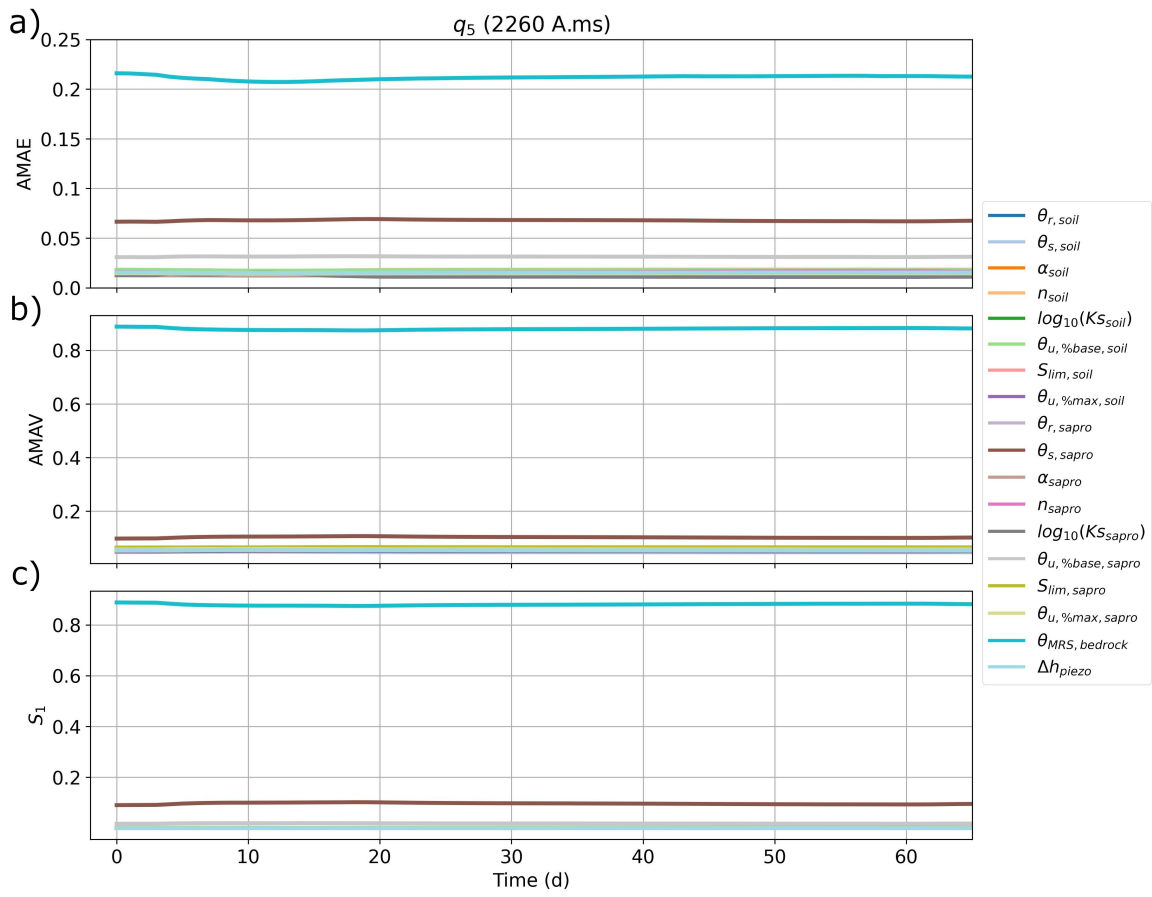

**Figure S3.** GSA indices a) AMAE, b) AMAV, c)  $S_1$  time-series for pulse  $q_5 = 2260$  A.ms.

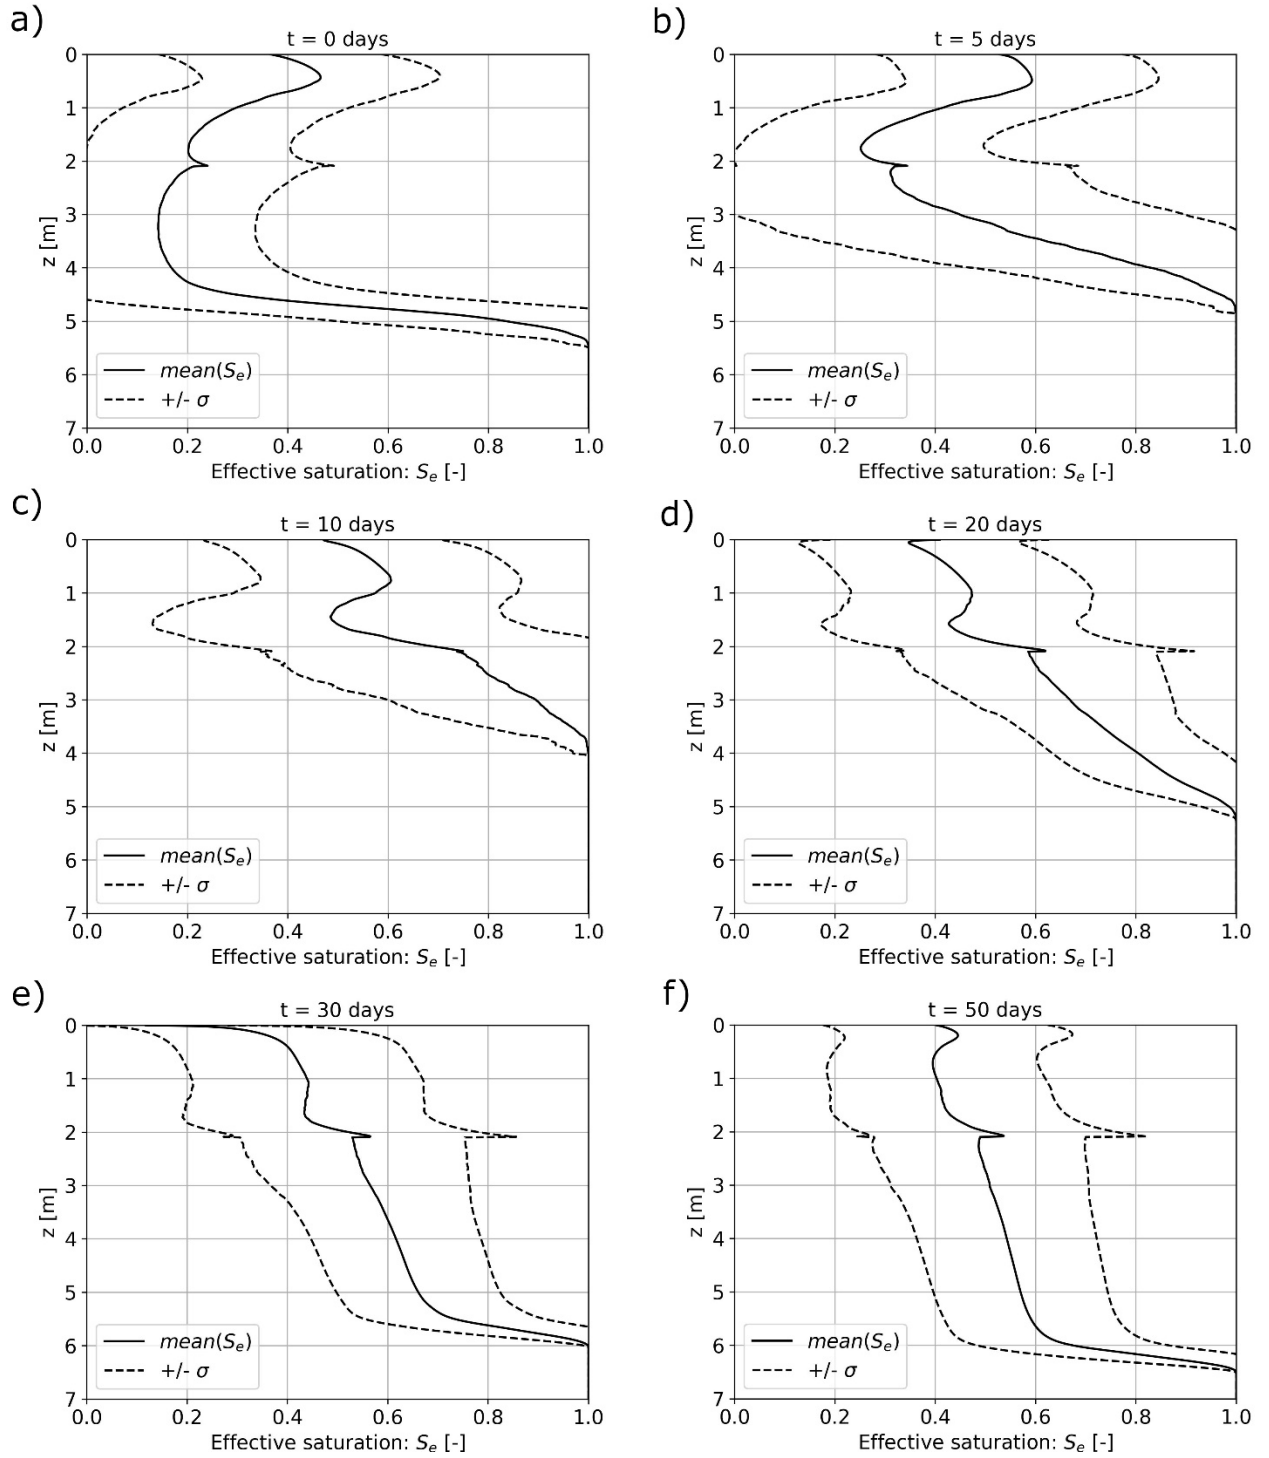

**Figure S4.** Mean effective saturation profiles  $S_e(z)$  and standard deviation  $\sigma$ , at times  $t \in \{0, 5, 10, 20, 30, 50\}$  days. The profiles are computed from 1000 parameter set samples.

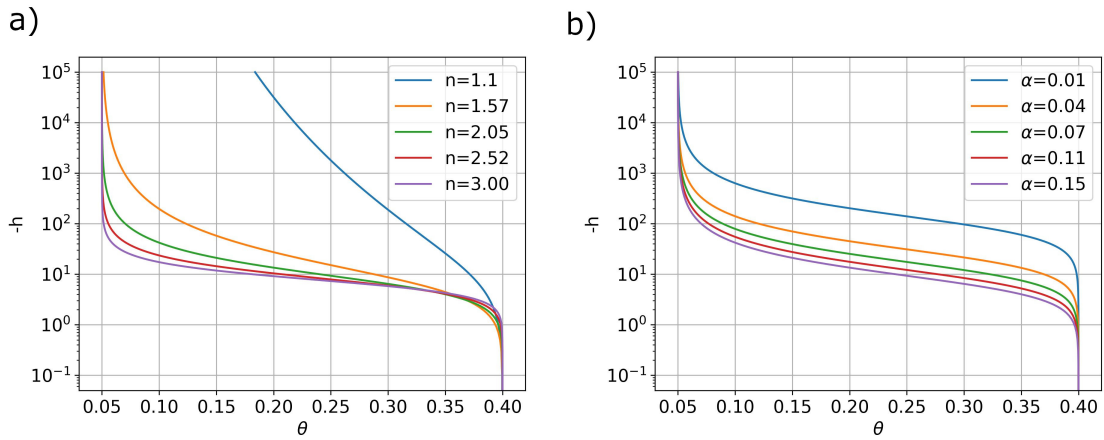

**Figure S5.** a) Retention curves examples for  $n \in \{1.1, 1.57, 2.05, 2.52, 3.0\}$ , with other hydrodynamic parameters fixed:  $\theta_r = 0.05$ ,  $\theta_s = 0.40$ ,  $\alpha = 8 \text{ m}^{-1}$ . b) Retention curve examples for  $\alpha \in \{1.0, 4.5, 8.0, 11.5, 15.0\} \text{ m}^{-1}$ , with other hydrodynamic parameters fixed:  $\theta_r = 0.05$ ,  $\theta_s = 0.40$ ,  $n = 2.05$ .

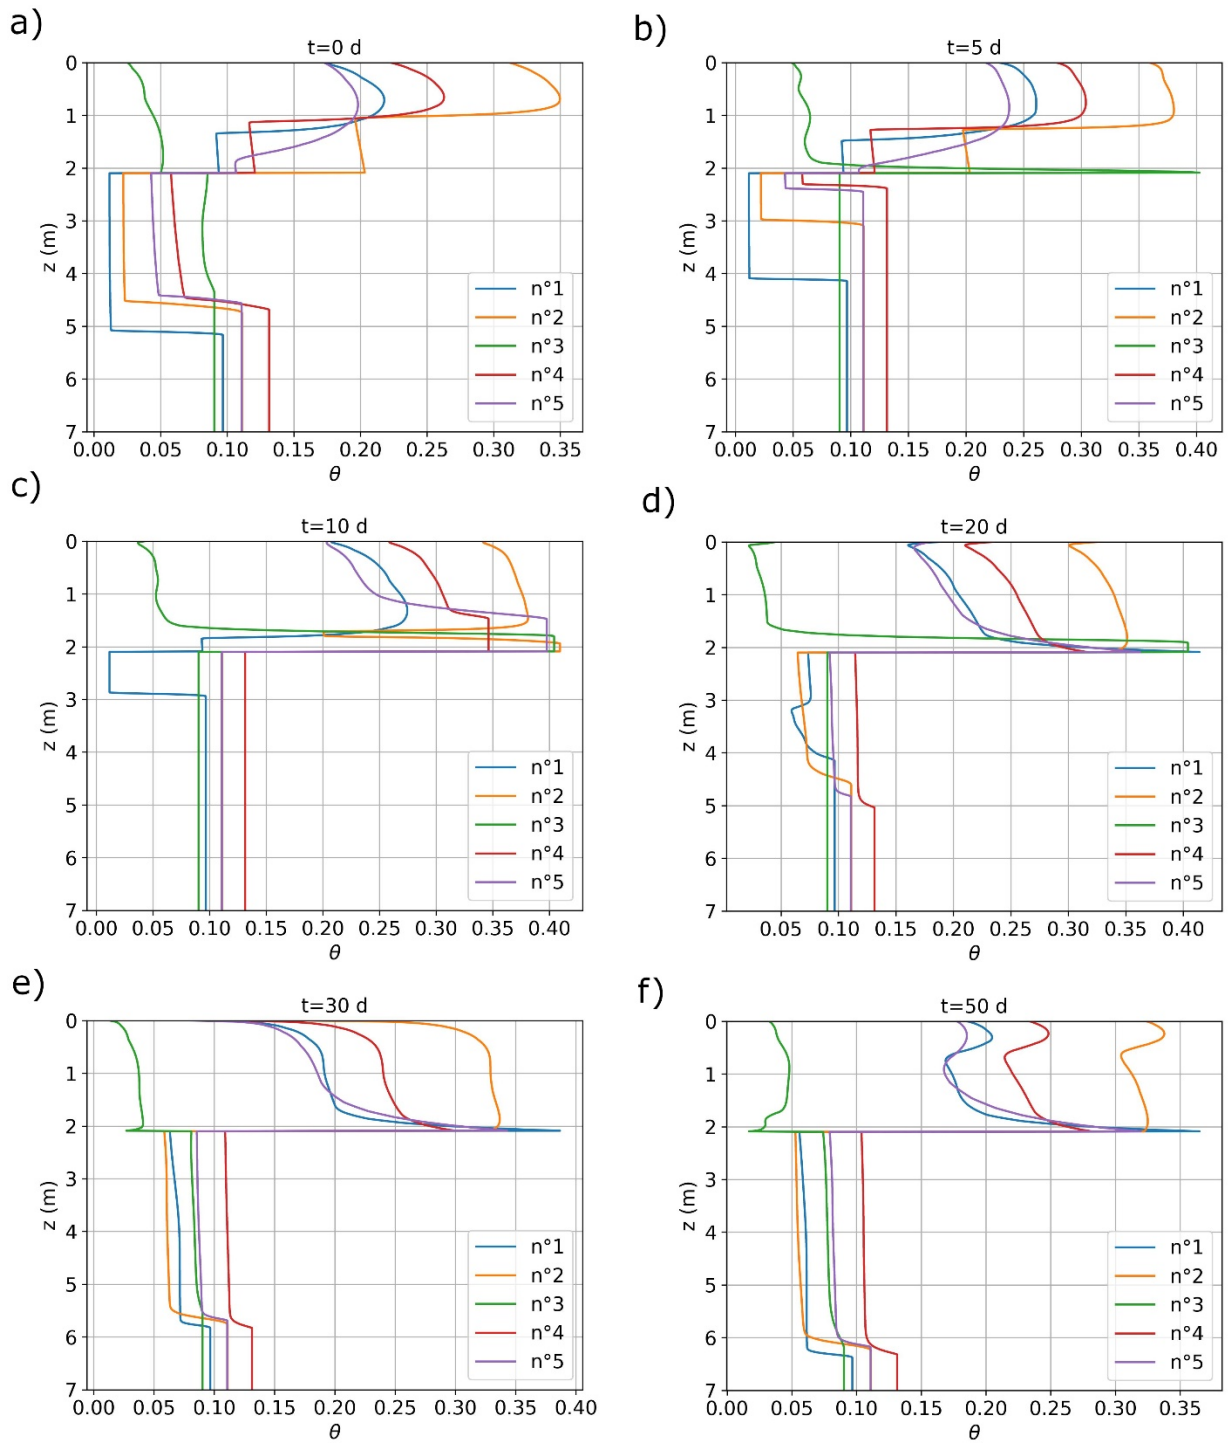

**Figure S6.** Water content profiles  $\theta(z)$  examples for five parameter sets, at times  $t \in \{0, 5, 10, 20, 30, 50\}$  days.
